# Supplementary material
Source: ML conference proceedings conference paper supplement (https://proceedings.neurips.cc/paper_files/paper/2016/hash/5d616dd38211ebb5d6ec52986674b6e4-Abstract.html)
Supplement: Supplementary file [file 5d616dd38211ebb5d6ec52986674b6e4-Supplemental.zip]

---

# Launch and Iterate: Reducing Prediction Churn

## Appendix

---

**Q. Cormier**  
 ENS Lyon  
 15 parvis René Descartes  
 Lyon, France  
 quentin.cormier@ens-lyon.fr

**M. Milani Fard, K. Canini, M. R. Gupta**  
 Google Inc.  
 1600 Amphitheatre Parkway  
 Mountain View, CA 94043  
 {mmilanifard,canini,mayagupta}@google.com

This appendix includes proofs of the theorems presented in the paper and details about the experimental design.

### A Proof of Theorem 1

*Proof.* Let  $z = (x, y)$  be a fixed testing sample. We define the function  $G_z : (\mathcal{X} \times \mathcal{Y})^{2m} \rightarrow \mathbb{R}$  as:

$$G_z(T, T') = \ell_\gamma(f_T(x), y) - \ell_\gamma(f_{T'}(x), y). \quad (1)$$

For any  $i \in \{1, \dots, m\}$ , if we re-sample the  $i$ th element in  $T$  to get  $T^i$ , using the  $\beta$ -stability of the learning algorithm and Lipschitz continuity of  $\ell_\gamma$  we get:

$$|G_z(T, T') - G_z(T^i, T')| \leq \frac{1}{\gamma} |f_T(x) - f_{T^i}(x)| \leq \frac{\beta}{\gamma}. \quad (2)$$

The same inequality holds for  $|G_z(T, T') - G_z(T, T'^i)|$ . We have  $\mathbb{E}_{T, T' \sim D^m} [G_z(T, T')] = 0$ , and thus can apply the McDiarmid inequality to get:

$$\Pr_{T, T' \sim D^m} [|G_z(T, T')| > \epsilon] \leq 2e^{-\frac{\epsilon^2 \gamma^2}{m \beta^2}}. \quad (3)$$

Integrating the above gives us the bound over the expectation:

$$\mathbb{E}_{T, T' \sim D^m} [|G_z(T, T')|] \leq \int_0^\infty \Pr_{T, T' \sim D^m} [|G_z(T, T')| > \epsilon] d\epsilon \leq \frac{\beta \sqrt{\pi m}}{\gamma}. \quad (4)$$

The above inequality holds for any fixed  $z$  and thus holds for the expectation:

$$\mathbb{E}_{T, T' \sim D^m} [C_\gamma(f_1, f_2)] = \mathbb{E}_{T, T' \sim D^m} \left[ \mathbb{E}_{Z \sim \mathcal{D}} [|G_Z(T, T')|] \right] \quad (5)$$

$$= \mathbb{E}_{Z \sim \mathcal{D}} \left[ \mathbb{E}_{T, T' \sim D^m} [|G_Z(T, T')|] \right] \quad (6)$$

$$\leq \frac{\beta \sqrt{\pi m}}{\gamma}. \quad (7)$$

□

### B Proof of Theorem 2

*Proof.* We again use the McDiarmid inequality, on the function  $H : (\mathcal{X} \times \mathcal{Y})^{2m} \rightarrow \mathbb{R}$  defined as:

$$H(T, T') = C_\gamma(f_T, f_{T'}) = \mathbb{E}_{(X, Y) \sim \mathcal{D}} [|\ell_\gamma(f_T(X), Y) - \ell_\gamma(f_{T'}(X), Y)|]. \quad (8)$$

For any  $i \in \{1, \dots, m\}$ , if we re-sample the  $i$ th element in  $T$  to get  $T^i$ , using the  $\beta$ -stability of the learning algorithm and Lipschitz continuity of  $\ell_\gamma$  we get:

$$|H(T, T') - H(T^i, T')| \leq \mathbb{E}_{(X, Y) \sim \mathcal{D}} \left[ |\ell_\gamma(f_T(X), Y) - \ell_\gamma(f_{T'}(X), Y)| - \right. \quad (9)$$

$$\left. |\ell_\gamma(f_{T^i}(X), Y) - \ell_\gamma(f_{T'}(X), Y)| \right] \quad (10)$$

$$\leq \mathbb{E}_{(X, Y) \sim \mathcal{D}} [|\ell_\gamma(f_T(X), Y) - \ell_\gamma(f_{T^i}(X), Y)|] \quad (11)$$

$$\leq \frac{\beta}{\gamma}, \quad (12)$$

where line (11) is by reverse triangular inequality. Same bound similarly holds for replacing the  $i$ th element in  $T'$ :  $|H(T, T') - H(T, T'^i)| \leq \beta/\gamma$ . Applying McDiarmid inequality and using the bound on the expectation of  $H$  from Theorem 1 completes the proof:

$$\begin{aligned} \Pr_{T, T' \sim \mathcal{D}^m} \left\{ C_\gamma(f_T, f_{T'}) > \epsilon + \frac{\sqrt{\pi m} \beta}{\gamma} \right\} &\leq \Pr_{T, T' \sim \mathcal{D}^m} \left\{ H(T, T') > \epsilon + \mathbb{E}_{T, T' \sim \mathcal{D}^m} [H(T, T')] \right\} \\ &\leq e^{-\frac{\epsilon^2 \gamma^2}{m \beta^2}}. \end{aligned} \quad (13)$$

□

## C Proof of Theorem 3

The proof partly follows Lemma 21 from [1] and Theorem 4 from [2]. Define:

$$\ell_j(g) = (g(x_j) - y_j)^2 \quad (14)$$

$$\hat{R}_T(g) = \frac{1}{m} \sum_{j=1}^m \ell_j(g) \quad (15)$$

$$\hat{R}_T^{\setminus i}(g) = \frac{1}{m} \sum_{\substack{j=1 \\ j \neq i}}^m \ell_j(g) \quad (16)$$

$$R_T(g) = \hat{R}_T(g) + \lambda \|g\|_k^2 \quad (17)$$

$$R_T^{\setminus i}(g) = \hat{R}_T^{\setminus i}(g) + \lambda \|g\|_k^2. \quad (18)$$

By the assumption of the theorem,  $f_T$  is the minimizer of  $R_T$ . Let  $f_T^{\setminus i}$  be the minimizer of  $R_T^{\setminus i}$ .

**Lemma 1.** *With the assumptions of Theorem 3, we have for all  $i$ :*

$$\forall x : (f_T(x) - f_T^{\setminus i}(x))^2 \leq \frac{\kappa^4}{\lambda^2 m^2} (f_T(x_i) - y_i)^2. \quad (19)$$

*Proof of Lemma 1.* To simplify the notation, we drop the  $T$  subscript throughout the proof of this lemma. Let  $d_\phi(f, g)$  be the functional Bregman divergence [3]:

$$d_\phi(f, g) = \phi(f) - \phi(g) - \nabla \phi(g; f - g), \quad (20)$$

where  $\nabla \phi(g; \cdot)$  is the Fréchet derivative of  $\phi$  at  $g$ . Since  $f$  and  $f^{\setminus i}$  are minimizers of  $R$  and  $R^{\setminus i}$  respectively, we have:  $\nabla R(f; \cdot) = 0$  and  $\nabla R^{\setminus i}(f^{\setminus i}; \cdot) = 0$ . We thus have:

$$d_R(f^{\setminus i}, f) + d_{R^{\setminus i}}(f, f^{\setminus i}) = R(f^{\setminus i}) - R(f) + R^{\setminus i}(f) - R^{\setminus i}(f^{\setminus i}) \quad (21)$$

$$= \frac{1}{m} \ell_i(f^{\setminus i}) - \frac{1}{m} \ell_i(f), \quad (22)$$

where the last line follows by the definition of  $R$  and  $R^{\setminus i}$ . By non-negativity and additivity of divergence ( $d_{A+B} = d_A + d_B$ ) we have:

$$0 \leq d_{\hat{R}^{\setminus i}}(f, f^{\setminus i}) + d_{\hat{R}^{\setminus i}}(f^{\setminus i}, f) \quad (23)$$

$$= -\lambda d_{\|\cdot\|_k^2}(f, f^{\setminus i}) - \lambda d_{\|\cdot\|_k^2}(f^{\setminus i}, f) + d_{R^{\setminus i}}(f, f^{\setminus i}) + d_{R^{\setminus i}}(f^{\setminus i}, f) \quad (24)$$

$$= -\lambda d_{\|\cdot\|_k^2}(f, f^{\setminus i}) - \lambda d_{\|\cdot\|_k^2}(f^{\setminus i}, f) + d_{R^{\setminus i}}(f, f^{\setminus i}) + d_R(f^{\setminus i}, f) - \frac{1}{m} d_{\ell_i}(f^{\setminus i}, f) \quad (25)$$

$$= -\lambda d_{\|\cdot\|_k^2}(f, f^{\setminus i}) - \lambda d_{\|\cdot\|_k^2}(f^{\setminus i}, f) + \frac{1}{m} \ell_i(f^{\setminus i}) - \frac{1}{m} \ell_i(f) - \frac{1}{m} d_{\ell_i}(f^{\setminus i}, f) \quad (26)$$

$$= -\lambda d_{\|\cdot\|_k^2}(f, f^{\setminus i}) - \lambda d_{\|\cdot\|_k^2}(f^{\setminus i}, f) + \frac{1}{m} \nabla \ell_i(f; f^{\setminus i} - f), \quad (27)$$

where line (26) is by the derivation in line (22), and line (27) is by the definition of the Bregman divergence. In the RKHS space, we have  $d_{\|\cdot\|_k^2}(g, g') = \|g - g'\|_k^2$ , and by assumption of Theorem 3 we have  $\forall x : |g(x)| \leq \kappa \|g\|_k$ . Substituting the Fréchet derivative in the above inequality, we get:

$$\|f - f^{\setminus i}\|_k^2 \leq \frac{1}{\lambda m} (f^{\setminus i}(x) - f(x))(f(x_i) - y_i) \quad (28)$$

$$\leq \frac{\kappa}{\lambda m} \|f^{\setminus i} - f\|_k (f(x_i) - y_i). \quad (29)$$

Cancelling the sides and squaring both sides, we get for all  $x$ :

$$(f(x) - f^{\setminus i}(x))^2 \leq \kappa^2 \|f - f^{\setminus i}\|_k^2 \quad (30)$$

$$\leq \frac{\kappa^4}{\lambda^2 m^2} (f(x_i) - y_i)^2. \quad (31)$$

□

*Proof of Theorem 3.* Let  $V = \ell_\gamma(f_T(X), Y) - \ell_\gamma(f_{T'}(X), Y)$ . Define  $V_i$ ,  $1 \leq i \leq 2m$  as:

$$V_i = \begin{cases} \ell_\gamma(f_T^{\setminus i}(X), Y) - \ell_\gamma(f_{T'}(X), Y) & \text{if } i \leq m \\ \ell_\gamma(f_T(X), Y) - \ell_\gamma(f_{T'}^{\setminus(i-m)}(X), Y) & \text{if } i > m \end{cases} \quad (32)$$

It is easy to see that  $\mathbb{E}_{T, T' \sim \mathcal{D}^m} [V] = 0$ . Using the concentration inequality of Theorem 6 from [4] on  $V$  and  $V_i$ , the symmetry of the training algorithm, and the symmetry of  $V$  on  $T$  and  $T'$  we get:

$$\mathbb{E}_{\substack{T, T' \sim \mathcal{D}^m \\ (X, Y) \sim \mathcal{D}}} [(\ell_\gamma(f_T(X), Y) - \ell_\gamma(f_{T'}(X), Y))^2] = \mathbb{E}_{\substack{T, T' \sim \mathcal{D}^m \\ (X, Y) \sim \mathcal{D}}} [V] \quad (33)$$

$$\leq \sum_{i=1}^{2m} \mathbb{E}_{\substack{T, T' \sim \mathcal{D}^m \\ (X, Y) \sim \mathcal{D}}} [(V - V_i)^2] \quad (34)$$

$$= 2 \mathbb{E}_{\substack{T, T' \sim \mathcal{D}^m \\ (X, Y) \sim \mathcal{D}}} \left[ \sum_{i=1}^m (V - V_i)^2 \right] \quad (35)$$

$$= \frac{2}{\gamma^2} \mathbb{E}_{\substack{T, T' \sim \mathcal{D}^m \\ (X, Y) \sim \mathcal{D}}} \left[ \sum_{i=1}^m (f_T(X) - f_T^{\setminus i}(X))^2 \right], \quad (36)$$

where line (36) is by Lipschitz continuity of  $\ell_\gamma$ . Applying Lemma 1 to RHS completes the proof. □

## D Further Experimental Details

Table 1 includes further details on the datasets used for experiments presented in the paper.

Table 1: Full details of the datasets used in the experimental analysis.

|                | Nomao [5]                                          | News Popularity [6]                                                                                                         | Twitter Buzz [7]                                                                     |
|----------------|----------------------------------------------------|-----------------------------------------------------------------------------------------------------------------------------|--------------------------------------------------------------------------------------|
| # Features     | 89 continuous<br>31 nominal<br>some missing values | 61 features<br>no missing values                                                                                            | 77 features<br>evolution of 11 primary<br>features through time<br>no missing values |
| # Samples      | 34,465                                             | 39,797                                                                                                                      | Sub-sampled 46,902                                                                   |
| Goal           | predict if two business<br>entities are the same   | predict if a news will be<br>shared more than 1400<br>times                                                                 | predict if a tweet is go-<br>ing to be popular                                       |
| $T_A$          | 4000 samples<br>drop first 5 features              | 8000 samples<br>drop the 3 features:<br><i>self_reference_min</i><br><i>self_reference_max</i><br><i>self_reference_avg</i> | 4000 samples<br>drop last 7 features                                                 |
| $T_B$          | 5000 samples<br>all the features                   | 10000 samples<br>all the features                                                                                           | 5000 samples<br>all the features                                                     |
| Validation Set | 1000 samples                                       | 1000 samples                                                                                                                | 1000 samples                                                                         |
| Testing Set    | 28465 samples                                      | 28797 samples                                                                                                               | 45402 samples                                                                        |

We optimized the hyper-parameters of each algorithm for each datasets on the validation set. Details of the chosen hyper-parameters for each algorithm is included in Table 2. The names of the parameters match the names used in Scikit-Learn [8].

Table 2: We summarize here the regularization parameters used to train the models. These parameters have been selected using a validation set of 1000 samples.

|              | Ridge<br>$\alpha$ | RFT-Regression<br><i>min_weight_fraction_leaf</i> | SVM<br>$C$ | Adaboost<br><i>learning_rate</i> | LinearSVR<br>$C$ |
|--------------|-------------------|---------------------------------------------------|------------|----------------------------------|------------------|
| Nomao        | 0.02              | 0.0001                                            | 10         | 1.5                              | 0.5              |
| News         | 2                 | 0.01                                              | 1.5        | 5                                | 10               |
| Twitter-Buzz | 1                 | 0.002                                             | 50         | 1.0                              | 75               |

Full results for all experiments are included in Table 3. We have included further results on linear SVM and AdaBoost (boosted stumps). However, note that there is a regression in accuracy between the two versions of the model for the baseline algorithm. We believe that that our hyper-parameter optimization did not find a good solution for these algorithms (likely resulting in over-fitting), or that we could not effectively use the implementation in Scikit-Learn [8].

Table 3: Experiment results on 3 domains with 5 different training algorithms for a single step RCP and the MCMC methods. For the MCMC experiment, we report the numbers with the standard deviation over the 40 runs of the chain.

|              |          |                  | Baseline<br>No RCP, No Chain | RCP<br>$\alpha = 0.5, \epsilon = 0.5$ | MCMC, $k = 30$<br>$\alpha = 0.5, \epsilon = 0.5$ | MCMC, $k = 30$<br>$\alpha = 0.7, \epsilon = 0.1$ |
|--------------|----------|------------------|------------------------------|---------------------------------------|--------------------------------------------------|--------------------------------------------------|
| Nomao        | Ridge    | WLR              | 1.24                         | 1.40                                  | 1.31                                             | 1.60                                             |
|              |          | $p_{\text{win}}$ | 26.5                         | 49.2                                  | 36.5                                             | 73.9                                             |
|              |          | $C_r$            | 1.00                         | 0.54                                  | $0.54 \pm 0.06$                                  | $0.32 \pm 0.05$                                  |
|              |          | Acc $V_1 / V_2$  | 93.1 / 93.4                  | 93.1 / 93.4                           | $93.2 \pm 0.1 / 93.4 \pm 0.1$                    | $93.0 \pm 0.3 / 93.2 \pm 0.2$                    |
|              | RF       | WLR              | 1.02                         | 1.13                                  | 1.09                                             | 1.12                                             |
|              |          | $p_{\text{win}}$ | 5.6                          | 13.4                                  | 9.8                                              | 13.1                                             |
|              |          | $C_r$            | 1.00                         | 0.83                                  | $0.83 \pm 0.05$                                  | $0.59 \pm 0.05$                                  |
|              |          | Acc $V_1 / V_2$  | 94.8 / 94.8                  | 94.8 / 95.0                           | $94.9 \pm 0.2 / 95.0 \pm 0.2$                    | $94.7 \pm 0.2 / 94.8 \pm 0.2$                    |
|              | AdaBoost | WLR              | 0.79                         | 0.79                                  | 0.00                                             | 0.00                                             |
|              |          | $p_{\text{win}}$ | 0.2                          | 0.2                                   | 0.0                                              | 0.0                                              |
|              |          | $C_r$            | 1.00                         | 1.00                                  | $0.01 \pm 0.06$                                  | $0.00 \pm 0.00$                                  |
|              |          | Acc $V_1 / V_2$  | 85.7 / 85.3                  | 85.7 / 85.3                           | $75.7 \pm 2.4 / 75.6 \pm 2.2$                    | $77.4 \pm 6.2 / 77.4 \pm 6.2$                    |
|              | LinSVM   | WLR              | 0.64                         | 0.89                                  | 0.90                                             | 2.60                                             |
|              |          | $p_{\text{win}}$ | 0.0                          | 1.2                                   | 1.3                                              | 99.8                                             |
|              |          | $C_r$            | 1.00                         | 0.75                                  | $0.76 \pm 0.02$                                  | $0.22 \pm 0.02$                                  |
|              |          | Acc $V_1 / V_2$  | 90.1 / 86.2                  | 90.1 / 89.3                           | $90.1 \pm 0.4 / 89.4 \pm 0.3$                    | $90.1 \pm 0.5 / 91.9 \pm 0.5$                    |
|              | SVM      | WLR              | 1.70                         | 2.51                                  | 2.32                                             | 2.08                                             |
|              |          | $p_{\text{win}}$ | 82.5                         | 99.7                                  | 99.2                                             | 97.1                                             |
|              |          | $C_r$            | 1.00                         | 0.75                                  | $0.69 \pm 0.06$                                  | $0.54 \pm 0.03$                                  |
|              |          | Acc $V_1 / V_2$  | 94.6 / 95.1                  | 94.6 / 95.2                           | $94.8 \pm 0.2 / 95.3 \pm 0.1$                    | $94.9 \pm 0.2 / 95.2 \pm 0.1$                    |
| News         | Ridge    | WLR              | 0.95                         | 0.94                                  | 1.04                                             | 0.97                                             |
|              |          | $p_{\text{win}}$ | 2.5                          | 2.4                                   | 6.7                                              | 3.4                                              |
|              |          | $C_r$            | 1.00                         | 0.75                                  | $0.78 \pm 0.04$                                  | $0.42 \pm 0.06$                                  |
|              |          | Acc $V_1 / V_2$  | 65.1 / 65.0                  | 65.1 / 65.0                           | $65.0 \pm 0.1 / 65.1 \pm 0.1$                    | $64.7 \pm 0.2 / 64.7 \pm 0.2$                    |
|              | RF       | WLR              | 1.07                         | 1.02                                  | 1.10                                             | 1.24                                             |
|              |          | $p_{\text{win}}$ | 8.5                          | 5.7                                   | 10.8                                             | 26.6                                             |
|              |          | $C_r$            | 1.00                         | 0.69                                  | $0.67 \pm 0.04$                                  | $0.04 \pm 0.04$                                  |
|              |          | Acc $V_1 / V_2$  | 64.5 / 65.1                  | 64.5 / 64.7                           | $64.3 \pm 0.3 / 64.8 \pm 0.2$                    | $63.0 \pm 0.4 / 63.0 \pm 0.4$                    |
|              | AdaBoost | WLR              | 0.72                         | 0.72                                  | 0.81                                             | 0.00                                             |
|              |          | $p_{\text{win}}$ | 0.0                          | 0.0                                   | 0.3                                              | 0.0                                              |
|              |          | $C_r$            | 1.00                         | 1.00                                  | $7.88 \pm 12.07$                                 | $0.03 \pm 0.06$                                  |
|              |          | Acc $V_1 / V_2$  | 59.3 / 59.2                  | 59.3 / 59.2                           | $59.4 \pm 0.2 / 59.2 \pm 0.0$                    | $58.7 \pm 1.1 / 58.7 \pm 1.1$                    |
|              | LinSVM   | WLR              | 0.81                         | 1.24                                  | 1.03                                             | 1.02                                             |
|              |          | $p_{\text{win}}$ | 0.3                          | 26.4                                  | 6.1                                              | 5.3                                              |
|              |          | $C_r$            | 1.00                         | 0.90                                  | $1.10 \pm 0.19$                                  | $1.12 \pm 0.26$                                  |
|              |          | Acc $V_1 / V_2$  | 63.3 / 62.5                  | 63.3 / 64.1                           | $63.5 \pm 0.5 / 63.6 \pm 0.5$                    | $63.0 \pm 0.8 / 63.1 \pm 0.7$                    |
|              | SVM      | WLR              | 1.17                         | 1.26                                  | 1.24                                             | 1.25                                             |
|              |          | $p_{\text{win}}$ | 18.4                         | 29.4                                  | 26.1                                             | 28.0                                             |
|              |          | $C_r$            | 1.00                         | 0.77                                  | $0.86 \pm 0.02$                                  | $0.61 \pm 0.02$                                  |
|              |          | Acc $V_1 / V_2$  | 64.9 / 65.4                  | 64.9 / 65.4                           | $64.8 \pm 0.1 / 65.4 \pm 0.1$                    | $64.7 \pm 0.2 / 65.1 \pm 0.1$                    |
| Twitter Buzz | Ridge    | WLR              | 1.71                         | 3.54                                  | 1.53                                             | 1.58                                             |
|              |          | $p_{\text{win}}$ | 83.1                         | 100.0                                 | 66.4                                             | 71.9                                             |
|              |          | $C_r$            | 1.00                         | 0.85                                  | $0.65 \pm 0.05$                                  | $0.44 \pm 0.04$                                  |
|              |          | Acc $V_1 / V_2$  | 89.7 / 89.9                  | 89.7 / 90.0                           | $90.1 \pm 0.1 / 90.2 \pm 0.1$                    | $89.7 \pm 0.1 / 89.7 \pm 0.1$                    |
|              | RF       | WLR              | 1.35                         | 1.15                                  | 1.15                                             | 1.03                                             |
|              |          | $p_{\text{win}}$ | 41.5                         | 16.1                                  | 15.9                                             | 6.0                                              |
|              |          | $C_r$            | 1.00                         | 0.86                                  | $0.77 \pm 0.07$                                  | $0.42 \pm 0.10$                                  |
|              |          | Acc $V_1 / V_2$  | 96.2 / 96.4                  | 96.2 / 96.3                           | $96.3 \pm 0.1 / 96.3 \pm 0.1$                    | $96.2 \pm 0.1 / 96.2 \pm 0.1$                    |
|              | AdaBoost | WLR              | 0.93                         | 0.90                                  | 1.13                                             | 1.17                                             |
|              |          | $p_{\text{win}}$ | 1.8                          | 1.2                                   | 13.3                                             | 18.4                                             |
|              |          | $C_r$            | 1.00                         | 1.03                                  | $0.80 \pm 0.18$                                  | $0.22 \pm 0.07$                                  |
|              |          | Acc $V_1 / V_2$  | 95.0 / 95.0                  | 95.0 / 95.0                           | $94.2 \pm 0.4 / 94.2 \pm 0.4$                    | $95.5 \pm 0.3 / 95.5 \pm 0.3$                    |
|              | LinSVM   | WLR              | 0.22                         | 2.66                                  | 3.71                                             | 3.82                                             |
|              |          | $p_{\text{win}}$ | 0.0                          | 99.9                                  | 100.0                                            | 100.0                                            |
|              |          | $C_r$            | 1.00                         | 0.52                                  | $0.61 \pm 0.45$                                  | $0.41 \pm 0.22$                                  |
|              |          | Acc $V_1 / V_2$  | 94.8 / 91.2                  | 94.8 / 96.2                           | $92.2 \pm 2.7 / 92.7 \pm 2.5$                    | $93.0 \pm 2.0 / 93.2 \pm 2.0$                    |
|              | SVM      | WLR              | 1.35                         | 1.77                                  | 1.55                                             | 1.33                                             |
|              |          | $p_{\text{win}}$ | 42.2                         | 86.6                                  | 68.4                                             | 39.3                                             |
|              |          | $C_r$            | 1.00                         | 0.70                                  | $0.70 \pm 0.03$                                  | $0.50 \pm 0.03$                                  |
|              |          | Acc $V_1 / V_2$  | 96.0 / 96.1                  | 96.0 / 96.1                           | $96.1 \pm 0.1 / 96.2 \pm 0.1$                    | $96.1 \pm 0.1 / 96.2 \pm 0.1$                    |

## References

- [1] O. Bousquet and A. Elisseeff. Stability and generalization. *Journal of Machine Learning Research*, 2(Mar):499–526, 2002.
- [2] O. Bousquet and A. Elisseeff. Algorithmic stability and generalization performance. In *Advances in Neural Information Processing Systems 13: Proceedings of the 2000 Conference*, volume 13, page 196. MIT Press, 2001.
- [3] B. A. Frigyik, S. Srivastava, and M. R. Gupta. Functional Bregman divergence and Bayesian estimation of distributions. *Information Theory, IEEE Transactions on*, 54(11):5130–5139, 2008.
- [4] S. Boucheron, G. Lugosi, and O. Bousquet. Concentration inequalities. In *Advanced Lectures on Machine Learning*, pages 208–240. Springer, 2004.
- [5] L. Candillier and V. Lemaire. Design and analysis of the Nomao challenge active learning in the real-world. In *Proceedings of the ALRA: Active Learning in Real-world Applications, Workshop ECML-PKDD*, 2012.
- [6] K. Fernandes, P. Vinagre, and P. Cortez. *Progress in Artificial Intelligence: 17th Portuguese Conference on Artificial Intelligence, EPIA 2015, Coimbra, Portugal, September 8-11, 2015. Proceedings*, chapter A Proactive Intelligent Decision Support System for Predicting the Popularity of Online News, pages 535–546. Springer International Publishing, Cham, 2015.
- [7] F. Kawala, E. Gaussier, A. Douzal-Chouakria, and E. Diemert. Apprentissage d’ordonnancement et influence de l’ambiguïté pour la prédiction d’activité sur les réseaux sociaux. In *Coria’2014*, pages 1–15, Nancy, France, France, March 2014.
- [8] F. Pedregosa, G. Varoquaux, A. Gramfort, V. Michel, B. Thirion, O. Grisel, M. Blondel, P. Prettenhofer, R. Weiss, V. Dubourg, J. Vanderplas, A. Passos, D. Cournapeau, M. Brucher, M. Perrot, and E. Duchesnay. Scikit-learn: Machine learning in Python. *Journal of Machine Learning Research*, 12:2825–2830, 2011.
